# Supplementary material for: Neutral Processes Drive Seasonal Assembly of the Skin Mycobiome
Source: PubMed Central journal article supplement (PMC6435813; doi:10.1128/msystems.00004-19), 2019-03-26
Supplement: mSystems.00004-19-sf001.pdf [file mSystems.00004-19-sf001.pdf]

**A**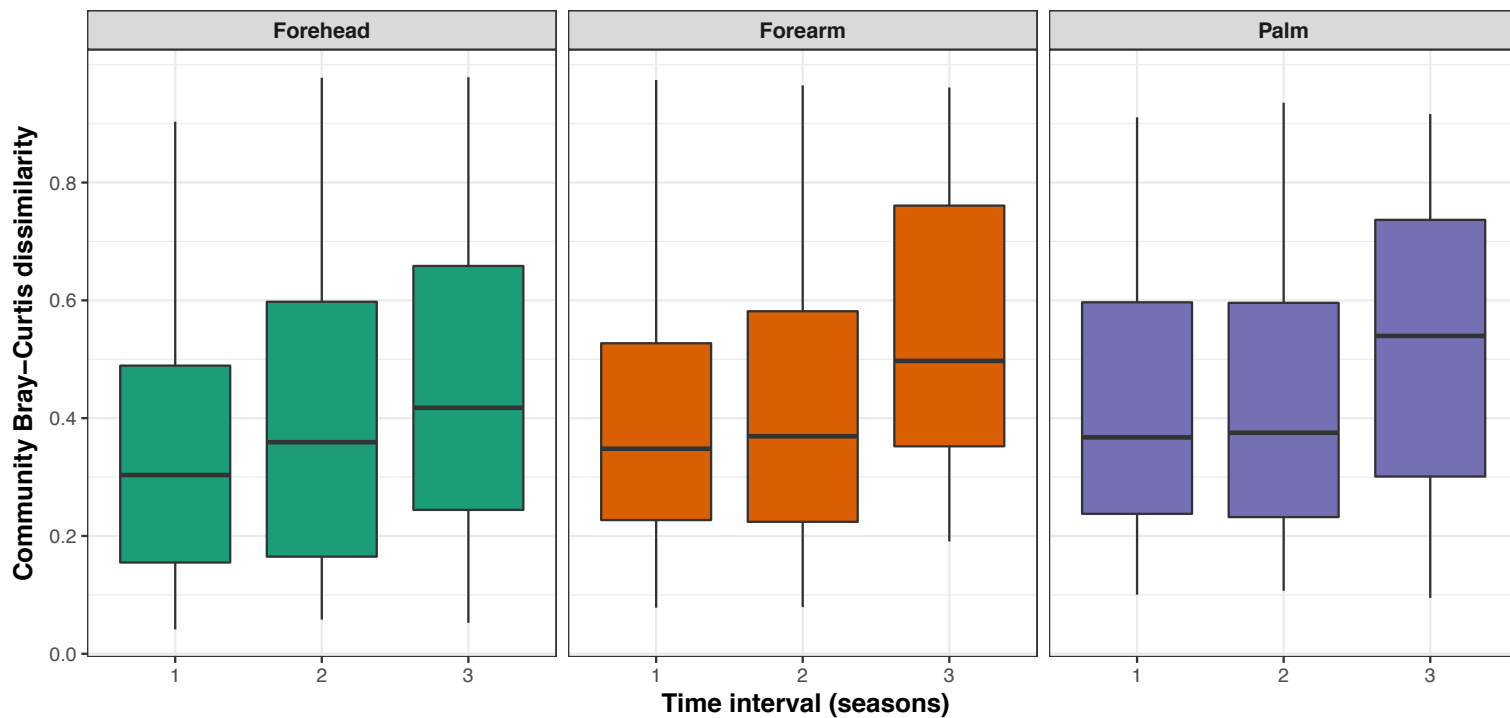**B**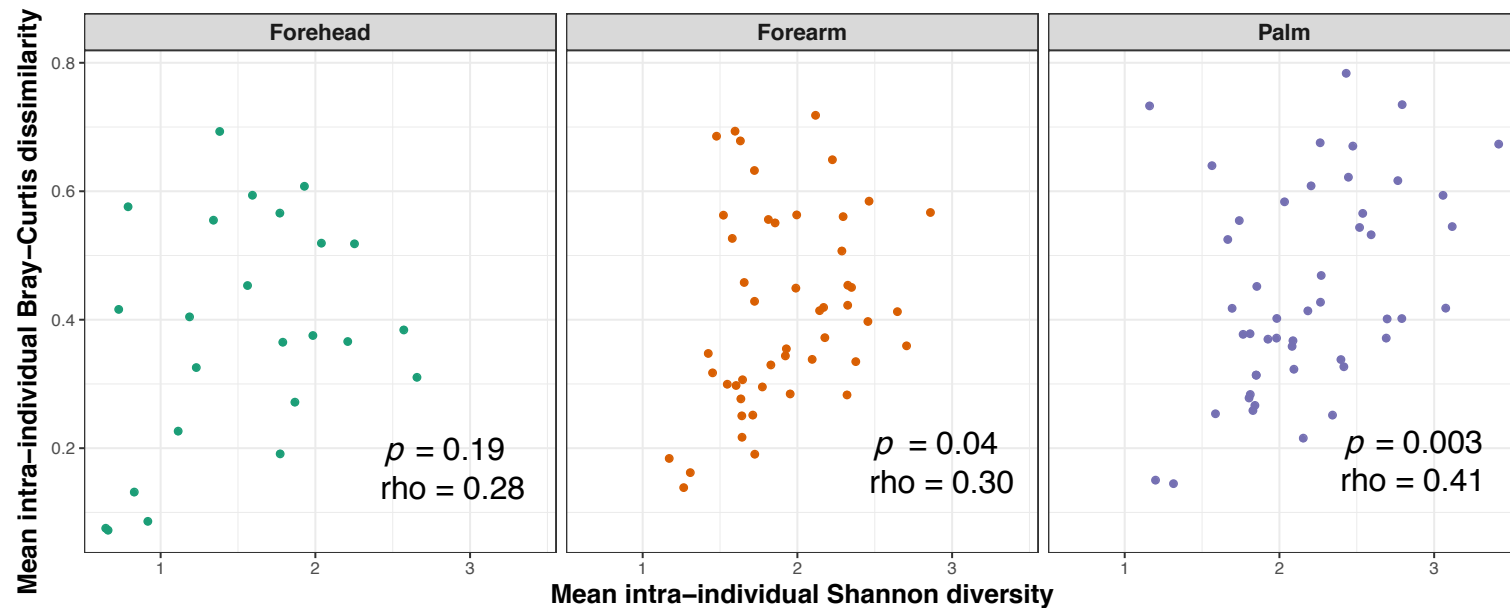**Fig. S1**
